# Supplementary material
Source: Springer Nature journal article supplement (https://www.springermedizin.de/resource/supplementary/12936_2010_1428_MOESM5_ESM.pdf/9549784)

No malaria

*P. vivax*

Summary image<sup>†</sup>

Individual image

Sample 1

Sample 2

Sample 3

A

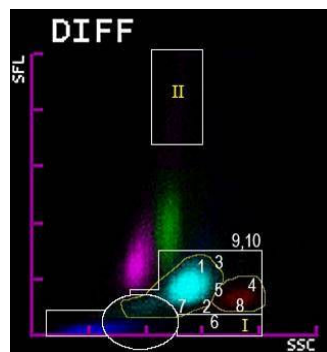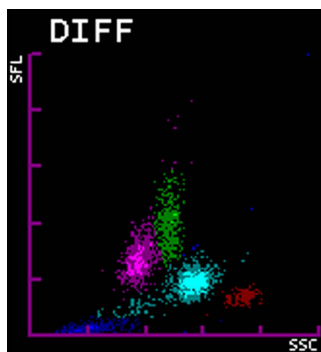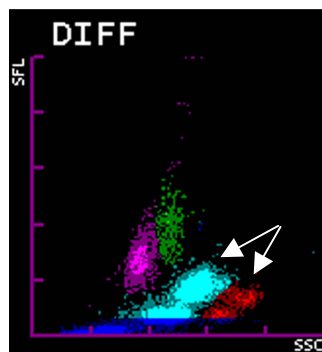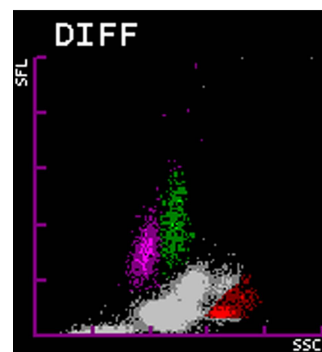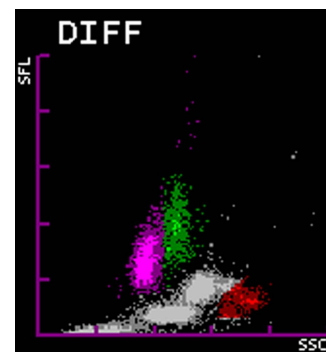

B

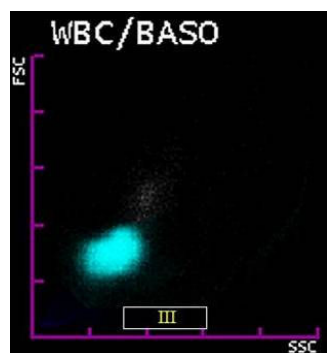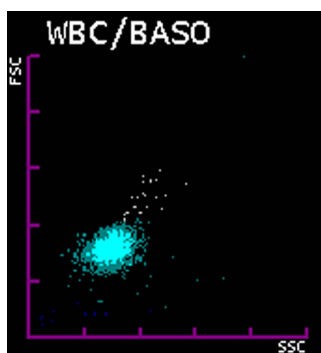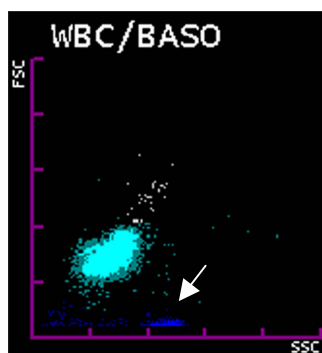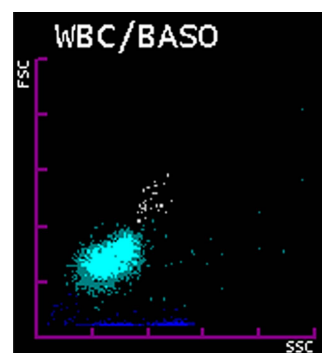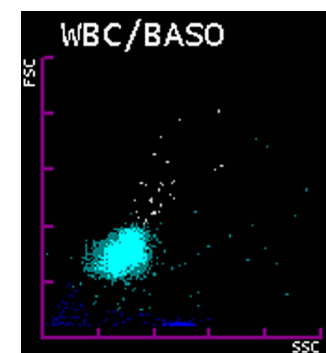

C

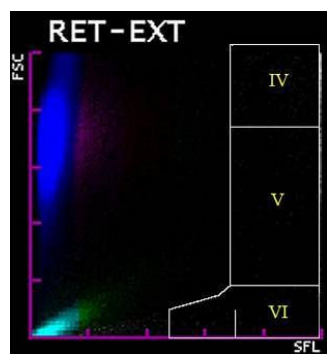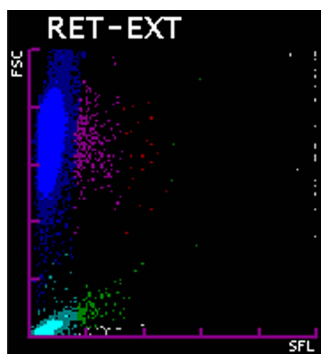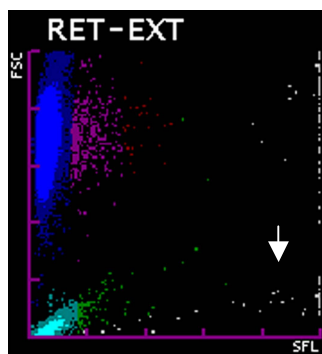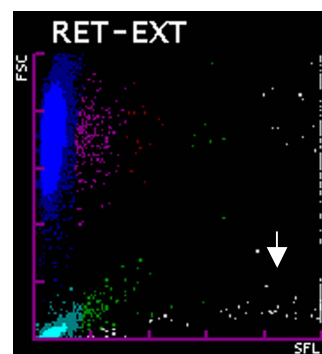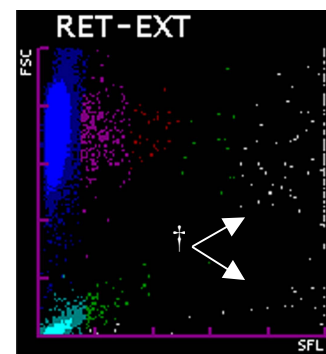

Supplement: MOESM5 [file 9549784]
